# Supplementary material for: Cancer Risk in Children of Mothers With Epilepsy and High-Dose Folic Acid Use During Pregnancy
Source: PubMed Central journal article supplement (PMC9513705; doi:10.1001/jamaneurol.2022.2977), 2022-09-26
Supplement: jamaneurol-e222977-s001.pdf [file jamaneurol-e222977-s001.pdf]

## Supplementary Online Content

Vegrim HM, Dreier JW, Alvestad S, et al. Cancer risk in children of mothers with epilepsy and high-dose folic acid use during pregnancy. *JAMA Neurol*. Published online September 26, 2022. doi:10.1001/jamaneurol.2022.2977

### **eAppendix.** Description of Data Sources

**eTable 1.** Ethical Approvals

**eTable 2.** Mean Dose Delivered of High-Dose Folic Acid Among Different Maternal Comorbidities

**eTable 3.** Interaction Between Antiseizure Medication and High-Dose Folic Acid in Mothers With and Without Epilepsy

**eTable 4.** Risk of Childhood Cancer During the First 10 Years of Life in Children Born to Mothers With and Without Epilepsy Filling Prescriptions for High-Dose Folic Acid

**eTable 5.** High-Dose Folic Acid and Type of Childhood Cancer

**eTable 6.** Risk of Leukemia in Children Born to Mothers With and Without Epilepsy Filling Prescriptions for High-Dose Folic Acid

**eTable 7.** Association Between Cancer in the Child and Average Delivered Dose of Folic Acid in Mothers With and Without Epilepsy

**eTable 8.** Association Between Cancer in the Child and Average Delivered Dose of Folic Acid in Mothers With and Without Epilepsy, Based on Estimated Mean Dose of Folic Acid

**eTable 9.** Prescription Fill for Antiseizure Medication and Risk of Childhood Cancer

**eTable 10.** Effect of Maternal Epilepsy on Risk of Childhood Cancer

**eTable 11.** Restrictions

**eTable 12.** Definition of Included Covariates

### **eReferences.**

This supplementary material has been provided by the authors to give readers additional information about their work.

## **eAppendix.** Description of Data Sources

Data from several nationwide, mandatory health registers were collected to perform this study. Below is a simple flowchart showing which and how the different registers were used.

### **Medical birth registers (MBR)**

MBR contains information on all births in mothers including national identification number, age, smoking, maternal parity, pregnancy and delivery diagnoses and interventions, offspring anomalies, birth outcome, gestational age, weight at birth, Apgar score. It is mandatory for health care providers to report to this register, and information is collected from medical records from the prenatal, delivery and neonatal care. The Medical Birth Register of Norway was founded in 1967, and the Danish and Swedish ones in 1973.

In Norway, the use of folic acid supplement (any dose) pre-conception and/or during pregnancy is recorded in the birth register.

### **Prescription registers (PDR)**

PDR contains data on dispensed prescriptions from pharmacies. This includes ATC-codes, drug strength, total defined daily dose dispensed, package size, and dispensing date. PDR does not contain information about over-the-counter medicines and medicines used during in-patient hospital stays. The Danish Registry of Medicinal Product Statistics contains information from 1995 and onwards, the Norwegian Prescription Database from 2004 and the Swedish Prescribed Drug Register from July 2005. The Norwegian and Danish Prescription Databases also contain information about the indication for reimbursement.

### **National patient registers (NPR)**

NPR contains information about diagnosis according to ICD-10 codes. The Norwegian Patient Registry contains information on all persons treated at hospitals as well in private clinics if they are reimbursed by the public health system. This information has been linked to the personal, national identification numbers since 2008. The Danish National Hospital Register contains information from hospital stays from 1977. ICD codes for psychiatric treatment are available from 1969 from the Psychiatric Central Research Register. From 1995, also data from somatic and psychiatric outpatient contacts are available. The Swedish National patient register includes all in-patient care in Sweden from 1987. The outpatient visits including psychiatric care from both private and public caregivers were included from 2001.

### **National statistical agencies (NSA)**

Each of the Nordic countries have national statistical agencies containing information on socioeconomic and demographic data on all inhabitants. These data contain yearly information on household income, education, occupation and demographical data on emigration and death. Most of the variables are digitized and follow international standards (ISCO-88 for occupation, ISCED2011 for education). Hence harmonization between the registers was feasible.

### **Cancer registers (CR)**

The Danish CR was established in 1941, in Norway in 1951 and in Sweden in 1958. It is mandatory for healthcare-providers to report information on diagnosis, treatment, and cause of death to the national cancer-registers.

All the CRs contain information about age, sex, time of diagnosis, site and type of tumor, stage, or extent of the cancer, in addition to several other variables, this for the entire study-period. CR uses an international standard (ICD-O-3) which contains precise information on morphology and topography.

**eTable 1.** Ethical Approvals

Ethical approvals were necessary to retrieve and manage data from the national social and health registers. This included approvals from the Data Protection Agency in Denmark; the Norwegian Inspectorate and the Regional Ethics Committee for Medical Research in Western Norway; and the Regional Ethical Board at Karolinska Institutet in Sweden. Below is an overview of approvals.

| <b>Ethical approvals from included countries</b> |                                          |                                   |                         |                           |
|--------------------------------------------------|------------------------------------------|-----------------------------------|-------------------------|---------------------------|
| Country                                          | Ethical approval                         | Data protection approvals         | Data transfer agreement | Data protection agreement |
| Denmark                                          | Not required for register-based research | Data protection agency            | N/A                     | ✓                         |
| Norway                                           | ✓                                        | Data protection impact assessment | ✓                       | ✓                         |
| Sweden                                           | ✓                                        | Local Data protection Officer     | ✓                       | ✓                         |

Abbreviations: N/A: Not applicable.  
 All register holders must approve of the project. Necessary approvals can change over time.  
 All data was exported to Denmark; thus, a data transfer agreement was not necessary.

**eTable 2.** Mean Dose Delivered of High-Dose Folic Acid Among Different Maternal Comorbidities

| Maternal characteristics or comorbidities       | Mean dose in mg (SD) |
|-------------------------------------------------|----------------------|
| General population                              | 3.1 (3.1)            |
| General population without maternal epilepsy    | 2.9 (2.9)            |
| Maternal epilepsy                               | 4.3 (4.1)            |
| Maternal use of ASM                             | 4.3 (4.1)            |
| Maternal use of ASM without epilepsy            | 3.1 (3.2)            |
| Maternal use of VPA in combination with any ASM | 4.4 (4.5)            |
| Maternal use of LTG in combination with any ASM | 4.1 (3.8)            |
| Maternal diabetes mellitus                      | 2.9 (3.1)            |
| Maternal smoking during the start of pregnancy  | 2.6 (2.8)            |
| Maternal BMI $\geq 30$ kg/m <sup>2</sup>        | 3.4 (3.5)            |

Abbreviations: ASM: Antiseizure medication; BMI: Body Mass Index; LTG: Lamotrigine; SD: Standard deviation; VPA: Valproic acid  
 The mean dose delivered of high dose folic acid in mg was calculated along with corresponding standard deviation for different maternal characteristics, comorbidities and comedication.

**eTable 3.** Interaction Between Antiseizure Medication and High-Dose Folic Acid in Mothers With and Without Epilepsy

Test for interaction between antiseizure medication and high dose folic acid on the risk of cancer in the offspring was performed in children to mothers with and without epilepsy. Level of significance was set to  $p < 0.05$ . Test for interaction was based on the fully adjusted model as presented in Table 2 by adding an interaction term to the analysis.

| <b>Test for interaction between antiseizure medication (ASM) and high dose folic acid on cancer risk in children to mothers with and without epilepsy</b> |         |
|-----------------------------------------------------------------------------------------------------------------------------------------------------------|---------|
| Test for interaction                                                                                                                                      | p-value |
| Children to mothers with epilepsy                                                                                                                         | 0.76    |
| Children to mothers without epilepsy                                                                                                                      | 0.48    |
| Abbreviations: ASM: Antiseizure medication.                                                                                                               |         |

**eTable 4.** Risk of Childhood Cancer During the First 10 Years of Life in Children Born to Mothers With and Without Epilepsy Filling Prescriptions for High-Dose Folic Acid

The risk of childhood cancer during the first ten first years of follow-up after birth was investigated for children born to mothers with and without diagnosis of epilepsy, filling prescription for high dose folic acid before and during pregnancy. The risk of cancer was 3.2 [95% CI 1.2-8.7] in children during the first ten years of follow-up if they were born to mothers with epilepsy filling prescription of high dose folic acid, compared to mothers with epilepsy that did not have such a prescription.

| <b>Association between maternal epilepsy, filled prescription of high dose folic acid, and risk of childhood cancer in the offspring up to age 10 years</b> |                             |                    |                                                        |                         |                                 |                                 |                                 |
|-------------------------------------------------------------------------------------------------------------------------------------------------------------|-----------------------------|--------------------|--------------------------------------------------------|-------------------------|---------------------------------|---------------------------------|---------------------------------|
| <b>Maternal epilepsy</b>                                                                                                                                    | <b>High dose folic acid</b> | <b>Live births</b> | <b>Incidence rate per 100 000 person-years, 95% CI</b> | <b>Crude HR, 95% CI</b> | <b>aHR1<sup>a</sup>, 95% CI</b> | <b>aHR2<sup>b</sup>, 95% CI</b> | <b>aHR3<sup>c</sup>, 95% CI</b> |
| Yes                                                                                                                                                         | Yes                         | 4462               | 40.5 (24.4-67.2)                                       | 2.9 (1.4-6.0)           | 2.8 (1.3-5.7)                   | 3.1 (1.1-8.4)                   | 3.2 (1.2-8.7)                   |
|                                                                                                                                                             | No                          | 15 750             | 14.6 (9.4-22.6)                                        | 1 [Reference]           | 1 [Reference]                   | 1 [Reference]                   | 1 [Reference]                   |
| No                                                                                                                                                          | Yes                         | 34 264             | 20.0 (15.4-25.9)                                       | 1.1 (0.9-1.5)           | 1.1 (0.9-1.5)                   | 1.1 (0.9-1.4)                   | 1.1 (0.9-1.4)                   |
|                                                                                                                                                             | No                          | 2 270 632          | 18.2 (17.7-18.8)                                       | 1 [Reference]           | 1 [Reference]                   | 1 [Reference]                   | 1 [Reference]                   |

a) aHR1: Adjustment for maternal age and education  
 b) aHR2: Including adjustment for antiseizure medication exposure.  
 c) aHR3: Including adjustment for maternal BMI, prior births with congenital anomalies, smoking during pregnancy, number of hospitalizations.  
 Birth year, sex of the child and source country were applied as stratum for all models.

**eTable 5.** High-Dose Folic Acid and Type of Childhood Cancer

Occurrence (number and percentage) of the three most ICC3 subgroups of cancer among children born to mothers with and without epilepsy filling for high dose folic acid. The three most common types of childhood cancers were also the most common types of cancer in children of mothers with epilepsy filling for high dose folic acid.

| <b>Frequency of cancer cases in different childhood cancer subgroups and fill for high dose folic acid</b> |                                |                             |                                |                             |
|------------------------------------------------------------------------------------------------------------|--------------------------------|-----------------------------|--------------------------------|-----------------------------|
| <b>ICC3 subgroups</b>                                                                                      | <b>No epilepsy</b>             |                             | <b>Epilepsy</b>                |                             |
|                                                                                                            | <b>No high dose folic acid</b> | <b>High dose folic acid</b> | <b>No high dose folic acid</b> | <b>High dose folic acid</b> |
| Group I: Leukemia                                                                                          | 1620 (30%)                     | 28 (40%)                    | 8 (30%)                        | 8 (40%)                     |

|                                         |            |          |         |          |
|-----------------------------------------|------------|----------|---------|----------|
| Group II & III: Lymphoma and CNS tumors | 1007 (20%) | 14 (20%) | 7 (30%) | 4 (<25%) |
| Other childhood cancer subtypes         | 2300       | 27       | 15      | 6        |

Abbreviations: ICC3: International Classification of Childhood Cancer 3<sup>rd</sup> edition.

**eTable 6.** Risk of Leukemia in Children Born to Mothers With and Without Epilepsy Filling Prescriptions for High-Dose Folic Acid

We calculated the HR for the most common childhood cancer type, leukemia, in children to mothers with or without epilepsy filling for high dose folic acid (1mg or 5mg folic acid). There was not sufficient no. of exposed cancer cases to report HRs for other cancer subtypes.

| <b>Association between fill for high dose folic acid by mothers with and without epilepsy and risk of leukemia in the offspring</b> |                             |                    |                     |                                                        |                         |                                 |                                 |                                 |
|-------------------------------------------------------------------------------------------------------------------------------------|-----------------------------|--------------------|---------------------|--------------------------------------------------------|-------------------------|---------------------------------|---------------------------------|---------------------------------|
| <b>Maternal epilepsy</b>                                                                                                            | <b>High dose folic acid</b> | <b>Live births</b> | <b>Cancer cases</b> | <b>Incidence rate per 100 000 person-years, 95% CI</b> | <b>Crude HR, 95% CI</b> | <b>aHR1<sup>a</sup>, 95% CI</b> | <b>aHR2<sup>b</sup>, 95% CI</b> | <b>aHR3<sup>c</sup>, 95% CI</b> |
| Yes                                                                                                                                 | Yes                         | 4462               | 8                   | 18.9 (9.5-37.8)                                        | 4.2 (1.5-12.3)          | 4.2 (1.4-12.2)                  | 6.3 (1.3-30.6)                  | 7.3 (1.5-35.2)                  |
|                                                                                                                                     | No                          | 15 750             | 8                   | 5.1 (2.5-10.2)                                         | 1 [Reference]           | 1 [Reference]                   | 1 [Reference]                   | 1 [Reference]                   |
| No                                                                                                                                  | Yes                         | 34 264             | 28                  | 8.1 (5.5-11.8)                                         | 1.3 (0.9-1.9)           | 1.3 (0.9-1.9)                   | 1.3 (0.9-1.9)                   | 1.3 (0.9-1.9)                   |
|                                                                                                                                     | No                          | 2 270 632          | 1620                | 6.3 (6.0-6.6)                                          | 1 [Reference]           | 1 [Reference]                   | 1 [Reference]                   | 1 [Reference]                   |

a) aHR1: Adjustment for maternal age and education  
b) aHR2: Including adjustment for antiseizure medication exposure.  
c) aHR3: Including adjustment for maternal BMI, prior births with congenital anomalies, smoking during pregnancy, number of hospitalizations.  
Birth year, sex of the child and source country were applied as stratum for all models.

**eTable 7.** Association Between Cancer in the Child and Average Delivered Dose of Folic Acid in Mothers With and Without Epilepsy

The average delivered dose of folic acid was calculated based on prescription fills for 1 mg and 5 mg of folic acid, filled between 90 days prior to the date of last menstrual period and until birth. This was categorized into >0 mg to <4 mg daily and ≥4 mg daily. These categories were examined for mothers with and without epilepsy, comparing both groups with mothers that had no fill for high dose folic acid. We were unable to make more categories due to few cancer cases among the exposed children.

| <b>Association between average daily dose of folic acid and risk of cancer in the offspring to mothers with and without epilepsy</b>                                                                                                                                                                                                              |                                         |                    |                     |                                                        |                         |                                 |                                 |                                 |
|---------------------------------------------------------------------------------------------------------------------------------------------------------------------------------------------------------------------------------------------------------------------------------------------------------------------------------------------------|-----------------------------------------|--------------------|---------------------|--------------------------------------------------------|-------------------------|---------------------------------|---------------------------------|---------------------------------|
| <b>Maternal epilepsy</b>                                                                                                                                                                                                                                                                                                                          | <b>Average daily dose of folic acid</b> | <b>Live births</b> | <b>Cancer cases</b> | <b>Incidence rate per 100 000 person-years, 95% CI</b> | <b>Crude HR, 95% CI</b> | <b>aHR1, 95% CI<sup>a</sup></b> | <b>aHR2, 95% CI<sup>b</sup></b> | <b>aHR3, 95% CI<sup>c</sup></b> |
| Yes                                                                                                                                                                                                                                                                                                                                               | >0 mg to <4 mg                          | 3389               | 11                  | 44.0 (24.3-79.4)                                       | 2.5 (1.2-5.1)           | 2.4 (1.2-4.9)                   | 2.8 (1.1-6.8)                   | 2.9 (1.2-7.2)                   |
|                                                                                                                                                                                                                                                                                                                                                   | No folic acid                           | 21 850             | 29                  | 18.4 (12.8-26.5)                                       | 1 [Reference]           | 1 [Reference]                   | 1 [Reference]                   | 1 [Reference]                   |
|                                                                                                                                                                                                                                                                                                                                                   | ≥4 mg                                   | 2545               | 7                   | 40.5 (19.3-85.0)                                       | 2.9 (1.1-7.4)           | 2.8 (1.1-7.1)                   | 3.1 (1.0-9.4)                   | 3.4 (1.1-10.7)                  |
|                                                                                                                                                                                                                                                                                                                                                   | No folic acid                           | 21 850             | 29                  | 18.4 (12.8-26.5)                                       | 1 [Reference]           | 1 [Reference]                   | 1 [Reference]                   | 1 [Reference]                   |
| No                                                                                                                                                                                                                                                                                                                                                | >0 mg to <4 mg                          | 35 307             | 54                  | 20.7 (15.8-27.1)                                       | 1.1 (0.9-1.5)           | 1.1 (0.9-1.5)                   | 1.1 (0.9-1.5)                   | 1.1 (0.9-1.5)                   |
|                                                                                                                                                                                                                                                                                                                                                   | No folic acid                           | 3 304 741          | 4874                | 19.0 (18.5-19.5)                                       | 1 [Reference]           | 1 [Reference]                   | 1 [Reference]                   | 1 [Reference]                   |
|                                                                                                                                                                                                                                                                                                                                                   | ≥4 mg                                   | 11 339             | 14                  | 17.8 (10.5-30.1)                                       | 1.0 (0.6-1.7)           | 1.0 (0.6-1.6)                   | 1.0 (0.6-1.6)                   | 1.0 (0.6-1.6)                   |
|                                                                                                                                                                                                                                                                                                                                                   | No folic acid                           | 3 304 741          | 4874                | 19.0 (18.5-19.5)                                       | 1 [Reference]           | 1 [Reference]                   | 1 [Reference]                   | 1 [Reference]                   |
| a) aHR1: Adjustment for maternal age and education<br>b) aHR2: Including adjustment for ASM exposure.<br>c) aHR3: Including adjustment for maternal BMI, prior births with congenital anomalies, smoking during pregnancy, number of hospitalizations.<br>Birth year, sex of the child and source country were applied as stratum for all models. |                                         |                    |                     |                                                        |                         |                                 |                                 |                                 |

**eTable 8.** Association Between Cancer in the Child and Average Delivered Dose of Folic Acid in Mothers With and Without Epilepsy, Based on Estimated Mean Dose of Folic Acid

The estimated mean dose in mothers with and without epilepsy were 4.3mg and 2.9mg, respectively. Therefore, we reran the analysis as presented in eTable 7, but here comparing use of mean daily prescribed dose of folic acid >0 to <3mg and ≥3mg. The numbers have for this table been rounded to closest ten due to close similarity with eTable 7 with the possibility to calculate difference with less than 5 exposed cancer cases.

| <b>Association between average daily dose of folic acid and risk of cancer in the offspring to mothers with and without epilepsy, based on estimated mean dose folic acid.</b> |                                         |                    |                     |                                                        |                         |                                 |                                 |                                 |
|--------------------------------------------------------------------------------------------------------------------------------------------------------------------------------|-----------------------------------------|--------------------|---------------------|--------------------------------------------------------|-------------------------|---------------------------------|---------------------------------|---------------------------------|
| <b>Maternal epilepsy</b>                                                                                                                                                       | <b>Average daily dose of folic acid</b> | <b>Live births</b> | <b>Cancer cases</b> | <b>Incidence rate per 100 000 person-years, 95% CI</b> | <b>Crude HR, 95% CI</b> | <b>aHR1, 95% CI<sup>a</sup></b> | <b>aHR2, 95% CI<sup>b</sup></b> | <b>aHR3, 95% CI<sup>c</sup></b> |

|                                                                                                                                                                                                                                                                                                                                                                                                                                                                      |                |           |      |                  |               |               |               |               |
|----------------------------------------------------------------------------------------------------------------------------------------------------------------------------------------------------------------------------------------------------------------------------------------------------------------------------------------------------------------------------------------------------------------------------------------------------------------------|----------------|-----------|------|------------------|---------------|---------------|---------------|---------------|
| Yes                                                                                                                                                                                                                                                                                                                                                                                                                                                                  | >0 mg to <3 mg | 3070      | 10   | 39.7 (20.7-76.3) | 2.2 (1.0-4.7) | 2.1 (1.0-4.6) | 2.5 (1.0-6.6) | 2.6 (1.0-6.9) |
|                                                                                                                                                                                                                                                                                                                                                                                                                                                                      | No folic acid  | 21 850    | 30   | 18.4 (12.8-26.5) | 1 [Reference] | 1 [Reference] | 1 [Reference] | 1 [Reference] |
|                                                                                                                                                                                                                                                                                                                                                                                                                                                                      | ≥3 mg          | 2860      | 10   | 45.8 (23.8-88.0) | 2.9 (1.3-6.7) | 2.8 (1.2-6.4) | 3.0 (1.1-8.3) | 3.3 (1.2-9.4) |
|                                                                                                                                                                                                                                                                                                                                                                                                                                                                      | No folic acid  | 21 850    | 30   | 18.4 (12.8-26.5) | 1 [Reference] | 1 [Reference] | 1 [Reference] | 1 [Reference] |
| No                                                                                                                                                                                                                                                                                                                                                                                                                                                                   | >0 mg to <3 mg | 33 660    | 50   | 20.8 (15.8-27.4) | 1.1 (0.9-1.5) | 1.1 (0.9-1.5) | 1.1 (0.9-1.5) | 1.1 (0.9-1.5) |
|                                                                                                                                                                                                                                                                                                                                                                                                                                                                      | No folic acid  | 3 304 740 | 4870 | 18.9 (18.4-19.5) | 1 [Reference] | 1 [Reference] | 1 [Reference] | 1 [Reference] |
|                                                                                                                                                                                                                                                                                                                                                                                                                                                                      | ≥3 mg          | 12 990    | 20   | 17.9 (10.9-29.2) | 1.0 (0.6-1.6) | 1.0 (0.6-1.6) | 1.0 (0.6-1.6) | 1.0 (0.6-1.6) |
|                                                                                                                                                                                                                                                                                                                                                                                                                                                                      | N/A            | 3 304 740 | 4870 | 18.9 (18.4-19.5) | 1 [Reference] | 1 [Reference] | 1 [Reference] | 1 [Reference] |
| <p>a) aHR1: Adjustment for maternal age and education<br/> b) aHR2: Including adjustment for ASM exposure.<br/> c) aHR3: Including adjustment for maternal BMI, prior births with congenital anomalies, smoking during pregnancy, number of hospitalizations.<br/> Birth year, sex of the child and source country were applied as stratum for all models.<br/> Counts have been rounded to closest ten due to close similarity to counts presented in eTable 7.</p> |                |           |      |                  |               |               |               |               |

**eTable 9.** Prescription Fill for Antiseizure Medication and Risk of Childhood Cancer

The risk of childhood cancers with maternal fills for ASM was examined. This was performed regardless of high dose folic acid use or not to be able to obtain a sufficient number of exposed cancer cases to report risk estimates.

| <b>Hazard rates (HR) of cancer in offspring of women with prescription fills for antiseizure-medication (ASM) regardless of high dose folic acid prescriptions, stratified for maternal epilepsy and types and combinations of antiseizure medications.</b> |                                   |                                                 |                         |                      |                       |
|-------------------------------------------------------------------------------------------------------------------------------------------------------------------------------------------------------------------------------------------------------------|-----------------------------------|-------------------------------------------------|-------------------------|----------------------|-----------------------|
| <b>Type of ASM</b>                                                                                                                                                                                                                                          | <b>Filled prescription of ASM</b> | <b>Incidence rates per 100 000 person years</b> | <b>Crude HR, 95% CI</b> | <b>aHR1*, 95% CI</b> | <b>aHR2**, 95% CI</b> |
| Any ASM                                                                                                                                                                                                                                                     | Yes                               | 29.00 (20.82-30.49)                             | 1.47 (1.04-2.06)        | 1.46 (1.04-2.06)     | 1.49 (1.07-2.09)      |
|                                                                                                                                                                                                                                                             | No                                | 18.93 (18.41-19.47)                             | 1 [Reference]           | 1 [Reference]        | 1 [Reference]         |
|                                                                                                                                                                                                                                                             | Yes                               | 30.69 (20.73-45.41)                             | 1.54 (0.84-2.78)        | 1.48 (0.82-2.69)     | 1.56 (0.86-2.83)      |



**Hazard rates (HR) of cancer in offspring of women with prescription fills for antiseizure-medication (ASM) regardless of high dose folic acid prescriptions, stratified for maternal epilepsy and types and combinations of antiseizure medications.**

| Type of ASM                               | Filled prescription of ASM | Incidence rates per 100 000 person years | Crude HR, 95% CI | aHR1*, 95% CI    | aHR2**, 95% CI   |
|-------------------------------------------|----------------------------|------------------------------------------|------------------|------------------|------------------|
| Any ASM within mothers with epilepsy      | No                         | 18.58 (12.24-28.22)                      | 1 [Reference]    | 1 [Reference]    | 1 [Reference]    |
|                                           | Yes                        | 25.49 (13.71-47.37)                      | 1.36 (0.73-2.52) | 1.34 (0.72-2.50) | 1.42 (0.76-2.64) |
| Any ASM within mothers without epilepsy   | No                         | 18.93 (18.41-19.47)                      | 1 [Reference]    | 1 [Reference]    | 1 [Reference]    |
|                                           | Yes                        | 28.11 (19.28-40.99)                      | 1.39 (0.94-2.05) | 1.39 (0.94-2.05) | 1.40 (0.95-2.07) |
| ≥ 2 prescriptions of any ASM              | No                         | 18.95 (18.42-19.48)                      | 1 [Reference]    | 1 [Reference]    | 1 [Reference]    |
|                                           | Yes                        | N/A <sup>a</sup>                         | N/A <sup>a</sup> | N/A <sup>a</sup> | N/A <sup>a</sup> |
| Any polytherapy                           | No                         | 18.49 (17.16-19.93)                      | 1 [Reference]    | 1 [Reference]    | 1 [Reference]    |
|                                           | Yes                        | 26.89 (18.02-40.12)                      | 1.36 (0.99-2.06) | 1.35 (0.89-2.05) | 1.36 (0.90-2.07) |
| Any monotherapy                           | No                         | 18.95 (18.43-19.49)                      | 1 [Reference]    | 1 [Reference]    | 1 [Reference]    |
|                                           | Yes                        | 35.79 (16.08-79.67)                      | 2.04 (0.91-4.54) | 2.04 (0.92-4.54) | 2.13 (0.96-4.74) |
| Valproate in combination with any ASM     | No                         | 18.97 (18.45-19.50)                      | 1 [Reference]    | 1 [Reference]    | 1 [Reference]    |
|                                           | Yes                        | N/A <sup>a</sup>                         | N/A <sup>a</sup> | N/A <sup>a</sup> | N/A <sup>a</sup> |
| Levetiracetam in combination with any ASM | No                         | 18.97 (18.45-19.50)                      | 1 [Reference]    | 1 [Reference]    | 1 [Reference]    |
|                                           | Yes                        | N/A <sup>a</sup>                         | N/A <sup>a</sup> | N/A <sup>a</sup> | N/A <sup>a</sup> |

**Hazard rates (HR) of cancer in offspring of women with prescription fills for antiseizure-medication (ASM) regardless of high dose folic acid prescriptions, stratified for maternal epilepsy and types and combinations of antiseizure medications.**

| Type of ASM                               | Filled prescription of ASM | Incidence rates per 100 000 person years | Crude HR, 95% CI | aHR1*, 95% CI    | aHR2**, 95% CI   |
|-------------------------------------------|----------------------------|------------------------------------------|------------------|------------------|------------------|
| Lamotrigine monotherapy                   | Yes                        | 29.19 (16.58-51.40)                      | 1.44 (0.79-2.63) | 1.43 (0.79-2.61) | 1.47 (0.89-2.43) |
|                                           | No                         | 18.96 (18.44-19.50)                      | 1 [Reference]    | 1 [Reference]    | 1 [Reference]    |
| Lamotrigine in combination with any ASM   | Yes                        | 32.23 (20.03-51.84)                      | 1.47 (0.89-2.42) | 1.47 (0.89-2.42) | 1.47 (0.89-2.42) |
|                                           | No                         | 18.95 (18.43-19.49)                      | 1 [Reference]    | 1 [Reference]    | 1 [Reference]    |
| Carbamazepine monotherapy                 | Yes                        | 37.81 (16.99-84.17)                      | 2.07 (0.93-4.64) | 2.05 (0.92-4.59) | 2.17 (0.97-4.86) |
|                                           | No                         | 18.97 (17.1-19.9)                        | 1 [Reference]    | 1 [Reference]    | 1 [Reference]    |
| Carbamazepine in combination with any ASM | Yes                        | 30.04 (13.50-66.87)                      | 1.69 (0.76-3.76) | 1.67 (0.75-3.72) | 1.77 (0.79-3.94) |
|                                           | No                         | 18.97 (18.45-19.51)                      | 1 [Reference]    | 1 [Reference]    | 1 [Reference]    |
| Other monotherapy <sup>b</sup>            | Yes                        | N/A <sup>a</sup>                         | N/A <sup>a</sup> | N/A <sup>a</sup> | N/A <sup>a</sup> |
|                                           | No                         | 18.98 (18.46-19.52)                      | 1 [Reference]    | 1 [Reference]    | 1 [Reference]    |

Abbreviations: aHR: adjusted hazard ratio; ASM: antiseizure medication; HR: hazard ratio  
\* aHR1: Adjustment for sex, maternal age and education  
\*\* aHR2: Including adjustment for maternal BMI, prior births with congenital anomalies, smoking during pregnancy, number of hospitalizations  
Birth year, sex of the child and source country were applied as stratum for all models.  
Analyses were performed without stratification on filled prescription for high dose folic acid to have sufficient number of exposed cancer cases to report HRs.

*Superscript*  
<sup>a</sup> Not sufficient no. of exposed cancer cases to be reported.  
<sup>b</sup> Other ASM: Topiramate, Clonazepam, Oxcarbazepine, Phenobarbital

**eTable 10.** Effect of Maternal Epilepsy on Risk of Childhood Cancer

We stratified children born to women with and without epilepsy with no further stratification on whether they were exposed to high dose folic acid or anti-seizure medication, to examine any effect of maternal epilepsy. Three adjustment models were performed as described in the statistical analysis. We did not observe any association between maternal epilepsy and risk of childhood cancer in the offspring (aHR=1.0, 95% CI 0.7-1.4).

| <b>Association between maternal epilepsy and risk of childhood cancer in the offspring</b> |             |                        |                                                 |                  |                           |                           |                           |
|--------------------------------------------------------------------------------------------|-------------|------------------------|-------------------------------------------------|------------------|---------------------------|---------------------------|---------------------------|
| Maternal epilepsy                                                                          | Live births | Childhood cancer cases | Incidence rate per 100 000 person-years, 95% CI | Crude HR, 95% CI | aHR1, 95% CI <sup>a</sup> | aHR2, 95% CI <sup>b</sup> | aHR3, 95% CI <sup>c</sup> |
| Yes                                                                                        | 27 784      | 48                     | 23.5 (17.7-31.3)                                | 1.2 (0.9-1.6)    | 1.2 (0.9-1.6)             | 1.0 (0.7-1.5)             | 1.0 (0.7-1.4)             |
| No                                                                                         | 3 351 387   | 4996                   | 18.9 (18.4-19.5)                                | 1 [Reference]    | 1 [Reference]             | 1 [Reference]             | 1 [Reference]             |

Abbreviations: aHR: adjusted hazard ratio; HR: hazard ratio  
a) aHR1: Adjustment for maternal age and education  
b) aHR2: Including adjustment for antiseizure medication exposure.  
c) aHR3: Including adjustment for maternal BMI, prior births with congenital anomalies, smoking during pregnancy, number of hospitalizations.  
Birth year, sex of the child and source country were applied as stratum for all models.

**eTable 11. Restrictions**

For the main analysis in Table 2, showing risk of cancer in children born to mothers with epilepsy and with and without high dose folic acid exposure, we reran the analysis with separate restrictions on covariates that might have influenced the association. This included maternal cancer before pregnancy, maternal tuberous sclerosis, maternal diabetes mellitus one year before birth. Maternal fill for valproate or carbamazepine included both monotherapy and combination with other ASMs. We also included separate exclusions on children with major congenital anomaly and chromosomal abnormality.

| <b>Restriction by main analysis in Table 2: Association between maternal epilepsy, high dose folic acid and childhood cancer</b> |                                       |                         |                     |
|----------------------------------------------------------------------------------------------------------------------------------|---------------------------------------|-------------------------|---------------------|
| <b>Restrictions</b>                                                                                                              | <b>No. excluded from the analysis</b> | <b>Crude HR, 95% CI</b> | <b>aHR, 95% CI*</b> |
| Maternal cancer before pregnancy                                                                                                 | 454                                   | 2.5 (1.3-4.6)           | 2.7 (1.2-6.3)       |
| Maternal diagnosis of tuberous sclerosis                                                                                         | 23                                    | 2.4 (1.3-4.5)           | 2.8 (1.2-6.3)       |
| Maternal diabetes mellitus                                                                                                       | 1292                                  | 2.2 (1.2-4.1)           | 2.6 (1.1-5.9)       |
| Maternal prescription fills for CBZ or VPA                                                                                       | 3407                                  | 2.1 (0.9-4.5)           | 2.4 (0.9-6.5)       |
| Major congenital anomaly in the child                                                                                            | 1761                                  | 2.5 (1.3-5.0)           | 2.3 (1.0-5.7)       |
| Chromosomal abnormalities in the child                                                                                           | 68                                    | 2.6 (1.4-5.0)           | 2.7 (1.2-6.3)       |

Abbreviations: aHR: adjusted hazard ratio; ASM: antiseizure medication; CBZ: Carbamazepine; HR: hazard ratio; VPA: Valproate.  
\* aHR: Adjusting for maternal age- and education, maternal BMI, prior births with congenital anomalies, smoking during pregnancy, number of hospitalizations.

Birth year, sex of the child and source country were applied as stratum for all models.

## eTable 12. Definition of Included Covariates

### Variable definitions

This table provide a complete overview with definitions on covariates and their sources that have been used in the paper “*High Dose Folic Acid during Pregnancy in Mothers with and without Epilepsy and Cancer Risk in their Children: A Scandinavian Register-based Cohort study*” by Vegrim et al.

The lay-out of the table is based on the S2 table from: “Relation of in-utero exposure to antiepileptic drugs to pregnancy duration and size at birth” by Margulis AV, Hernandez-Diaz H, McElrath T, Rothman KJ, Plana E, Almqvist C, D’Onofrio BM, Oberg AS.<sup>1</sup>

### Contents

|                                                         |    |
|---------------------------------------------------------|----|
| eTable 12 Definition of included covariates .....       | 14 |
| Maternal definitions .....                              | 14 |
| Child definitions.....                                  | 16 |
| Definition of pregnancy complications .....             | 16 |
| Medical exposure definitions.....                       | 17 |
| Maternal somatic comorbidities .....                    | 19 |
| Childhood cancer definition according to the ICC3 ..... | 20 |
| References.....                                         | 30 |

### Abbreviations

ATC: Anatomical therapeutic chemical; CR: Cancer registers; BMI: Body mass index; ICC3: International Classification of Childhood Cancer 3<sup>rd</sup> edition; ICD: International Classification of Diseases; ICD-O/3: International Classification of Diseases for Oncology, 3<sup>rd</sup> edition; LMP: Last menstrual period; MBR: Medical birth registers; NPR: National patient registers; NSA: National statistical agencies; N/A; Not applicable; PDR: Prescription registers.

| Table 12 Definition of included covariates |                   |                                                                                                                                             |          |                                | Codes |        |                    |                    |
|--------------------------------------------|-------------------|---------------------------------------------------------------------------------------------------------------------------------------------|----------|--------------------------------|-------|--------|--------------------|--------------------|
| Cohort characteristic                      | Time frame        | Functional form of Variable and Comments                                                                                                    | Register | Non-ICD or ATC-Coded Variables | ATC   | ICD-10 | ICD-O/3 Morphology | ICD-O/3 Topography |
| <b>Maternal definitions</b>                |                   |                                                                                                                                             |          |                                |       |        |                    |                    |
| First day of last menstrual period (LMP).  | N/A               | Date of first day in last menstrual period. Estimated subtracting the date of birth from gestational age at birth.                          | MBR      |                                |       |        |                    |                    |
| Maternal age.                              | At delivery.      | Continuous.                                                                                                                                 | MBR      |                                |       |        |                    |                    |
| Maternal education.                        | Year of delivery. | Categorical:<br>0: Compulsory.<br>1: Pre-university.<br>2: College/University.<br>3: Post-graduate.<br>4: Missing information on education. | MBR      |                                |       |        |                    |                    |
| Maternal country of birth.                 | N/A               | Mother born in the country of delivery or not.<br>1) Source country.<br>2) All other countries.                                             | NSA, MBR |                                |       |        |                    |                    |
| Calendar year of delivery.                 | Year of delivery  | Continuous.                                                                                                                                 | MBR      |                                |       |        |                    |                    |
| Parity.                                    | N/A               | Number of previous deliveries: 0, 1 or $\geq 2$ .                                                                                           | MBR      |                                |       |        |                    |                    |
| Child sex.                                 | At delivery.      | Categorical: Female or male.                                                                                                                | MBR      |                                |       |        |                    |                    |

| eTable 12 Definition of included covariates         |                        |                                                                                                                                                                                                                      |                     |                                | Codes |             |                    |                    |
|-----------------------------------------------------|------------------------|----------------------------------------------------------------------------------------------------------------------------------------------------------------------------------------------------------------------|---------------------|--------------------------------|-------|-------------|--------------------|--------------------|
| Cohort characteristic                               | Time frame             | Functional form of Variable and Comments                                                                                                                                                                             | Register            | Non-ICD or ATC-Coded Variables | ATC   | ICD-10      | ICD-O/3 Morphology | ICD-O/3 Topography |
| Child birthweight.                                  | At delivery.           | Continuous.                                                                                                                                                                                                          | MBR                 |                                |       |             |                    |                    |
| Child gestational age.                              | At delivery            | Continuous.                                                                                                                                                                                                          | MBR                 |                                |       |             |                    |                    |
| BMI.                                                | At start of pregnancy. | Categorical: As recorded in MBR or calculated from maternal weight and height at first antenatal visit (kg/m <sup>2</sup> ).<br>- Non-obese <35 kg/m <sup>2</sup> .<br>- Obese ≥35 kg/m <sup>2</sup> .<br>- Missing. | MBR                 |                                |       |             |                    |                    |
| Smoking.                                            | Start of pregnancy.    | Categorical: Y/N/Missing.                                                                                                                                                                                            | MBR                 | Checkbox MBR                   |       |             |                    |                    |
| Previous congenital anomaly.                        | N/A                    | Categorical: Y/N. Computed as summarized previous births with congenital anomalies.                                                                                                                                  | MBR                 |                                |       |             |                    |                    |
| Prior birth to child with major congenital anomaly. | Full lookback.         | Categorical: Y/N.<br><br>Definition of major congenital malformation in accordance with EUROCAT definition <sup>2</sup> .                                                                                            | NP<br>R,<br>MB<br>R |                                |       | Q00-<br>Q99 |                    |                    |

| eTable 12 Definition of included covariates  |                     |                                                                                                                                                                                                |           |                                | Codes |                |                    |                    |
|----------------------------------------------|---------------------|------------------------------------------------------------------------------------------------------------------------------------------------------------------------------------------------|-----------|--------------------------------|-------|----------------|--------------------|--------------------|
| Cohort characteristic                        | Time frame          | Functional form of Variable and Comments                                                                                                                                                       | Register  | Non-ICD or ATC-Coded Variables | ATC   | ICD-10         | ICD-O/3 Morphology | ICD-O/3 Topography |
| <b>Child definitions</b>                     |                     |                                                                                                                                                                                                |           |                                |       |                |                    |                    |
| Child sex.                                   | At delivery.        | Categorical: Female or male.                                                                                                                                                                   | MBR       |                                |       |                |                    |                    |
| Child birthweight.                           | At delivery.        | Continuous.                                                                                                                                                                                    | MBR       |                                |       |                |                    |                    |
| Child gestational age.                       | At delivery         | Continuous.                                                                                                                                                                                    | MBR       |                                |       |                |                    |                    |
| Chromosomal abnormality.                     | Any time.           | Categorical: Y/N. Composite variable: Any of the codes for chromosomal abnormality.                                                                                                            | NP R      |                                |       | Q90-Q99        |                    |                    |
| Congenital major anomaly                     | Any time.           | Categorical: Y/N. Composite variable: Any of the codes for major congenital anomalies.<br><br>Definition of major congenital malformation in accordance with EUROCAT definition <sup>2</sup> . | NP R      |                                |       | Q00-Q89        |                    |                    |
| <b>Definition of pregnancy complications</b> |                     |                                                                                                                                                                                                |           |                                |       |                |                    |                    |
| Gestational diabetes.                        | LMP-90 to delivery. |                                                                                                                                                                                                | MBR, NP R | Checkbox MBR                   |       | O24.4<br>O24.9 |                    |                    |



| Table 12 Definition of included covariates |                     |                                                                                                                                                                                                                         |          |                                | Codes                     |             |                    |                    |
|--------------------------------------------|---------------------|-------------------------------------------------------------------------------------------------------------------------------------------------------------------------------------------------------------------------|----------|--------------------------------|---------------------------|-------------|--------------------|--------------------|
| Cohort characteristic                      | Time frame          | Functional form of Variable and Comments                                                                                                                                                                                | Register | Non-ICD or ATC-Coded Variables | ATC                       | ICD-10      | ICD-O/3 Morphology | ICD-O/3 Topography |
| Gestational hypertension.                  | LMP-90 to delivery. | Any code for gestational hypertension, preeclampsia, HELLP and/or eclampsia.                                                                                                                                            | MBR, NRR | Checkbox MBR                   |                           | O11, O13-16 |                    |                    |
| <b>Medical exposure definitions</b>        |                     |                                                                                                                                                                                                                         |          |                                |                           |             |                    |                    |
| Any high dose folic acid.                  | LMP-90 to delivery. | Categorical: Y/N.<br>Any filled prescriptions of either 1mg or 5mg.<br><br>Separate variables for filled prescriptions of 1mg or 5mg.                                                                                   | PD<br>R  |                                | B03BB01                   |             |                    |                    |
| Folic acid average dose.                   | LMP-90 to delivery. | Average daily dose of folic acid supplements calculated from the total amount of folic acid supplements dispensed, divided by the number within defined time frame.<br><br>Separate variables based on 1mg or 5mg only. | PD<br>R  |                                | B03BB01<br>B03BB51        |             |                    |                    |
| Folic acid cumulative dose.                | LMP-90 to delivery. | Cumulative folic acid dose based on total no. of pills dispensed during the defined time frame.<br><br>Separate variables based on 1mg or 5mg only.                                                                     | PD<br>R  |                                | B03BB01<br>B03BB51        |             |                    |                    |
| Any antiseizure medication.                | LMP-90 to delivery. | Categorical: Y/N.<br><br>Any monotherapy or polytherapy                                                                                                                                                                 | PD<br>R  |                                | N03<br>N05BA09<br>S01EC01 |             |                    |                    |

| Table 12 Definition of included covariates |                      |                                                                                     |          |                                | Codes   |        |                    |                    |
|--------------------------------------------|----------------------|-------------------------------------------------------------------------------------|----------|--------------------------------|---------|--------|--------------------|--------------------|
| Cohort characteristic                      | Time frame           | Functional form of Variable and Comments                                            | Register | Non-ICD or ATC-Coded Variables | ATC     | ICD-10 | ICD-O/3 Morphology | ICD-O/3 Topography |
| Valproate monotherapy.                     | LMP-90 to deliver y. | Categorical: $\geq 1$ prescriptions of valproate and no other type of ASM: Y/N.     | PD<br>R  |                                | N03AG01 |        |                    |                    |
| Lamotrigine monotherapy.                   | LMP-90 to deliver y. | Categorical: $\geq 1$ prescriptions of lamotrigine and no other type of ASM: Y/N.   | PD<br>R  |                                | N03AX09 |        |                    |                    |
| Levetiracetam monotherapy.                 | LMP-90 to deliver y. | Categorical: $\geq 1$ prescriptions of levetiracetam and no other type of ASM: Y/N. | PD<br>R  |                                | N03AX14 |        |                    |                    |
| Carbamazepine monotherapy.                 | LMP-90 to deliver y. | Categorical: $\geq 1$ prescriptions of carbamazepine and no other type of ASM: Y/N. | PD<br>R  |                                | N03AF01 |        |                    |                    |
| Topiramate monotherapy.                    | LMP-90 to deliver y. | Categorical: $\geq 1$ prescriptions: Y/N.                                           | PD<br>R  |                                | N03AX11 |        |                    |                    |
| Clonazepam monotherapy.                    | LMP-90 to deliver y. | Categorical: $\geq 1$ prescriptions: Y/N.                                           | PD<br>R  |                                | N03AE01 |        |                    |                    |
| Oxcarbazepine monotherapy.                 | LMP-90 to deliver y. | Categorical: $\geq 1$ prescriptions: Y/N.                                           | PD<br>R  |                                | N03AF02 |        |                    |                    |
| Phenobarbital monotherapy.                 | LMP-90 to deliver y. | Categorical: $\geq 1$ prescriptions: Y/N.                                           | PD<br>R  |                                | N03AB02 |        |                    |                    |

| eTable 12 Definition of included covariates |                          |                                           |                                 |                                | Codes   |        |                                                      |                                   |
|---------------------------------------------|--------------------------|-------------------------------------------|---------------------------------|--------------------------------|---------|--------|------------------------------------------------------|-----------------------------------|
| Cohort characteristic                       | Time frame               | Functional form of Variable and Comments  | Register                        | Non-ICD or ATC-Coded Variables | ATC     | ICD-10 | ICD-O/3 Morphology                                   | ICD-O/3 Topography                |
| Phenytoin monotherapy.                      | LMP-90 to delivery.      | Categorical: $\geq 1$ prescriptions: Y/N. | PD<br>R                         |                                | N03AB02 |        |                                                      |                                   |
| <b>Maternal somatic comorbidities</b>       |                          |                                           |                                 |                                |         |        |                                                      |                                   |
| Epilepsy.                                   | Full lookback.           | Categorical: Y/N                          | NP<br>R,<br>MB<br>R,<br>PD<br>R | Check-box<br>MBR               |         | G40-41 |                                                      |                                   |
| Diabetes mellitus.                          | LMP-365 to delivery.     | Categorical: Y/N                          | NP<br>R,<br>MB<br>R             | Checkbox<br>MBR                |         | E10-14 |                                                      |                                   |
| Tuberous sclerosis.                         | Full lookback.           | Categorical: Y/N                          | NP<br>R                         |                                |         | Q85.1  |                                                      |                                   |
| Number of hospitalizations.                 | LMP-365 to delivery.     | Categorical: 0, 1, $\geq 2$ .             | NP<br>R                         |                                |         |        |                                                      |                                   |
| Maternal cancer.                            | Any time until delivery. | Categorical: Y/N.                         | CR                              |                                |         | C00-97 | ICD-O/3 behavioral code of 3 except for CNS cancers. | Group based on ICD-10 C-chapters. |

| eTable 12 Definition of included covariates                                                                                                         |                |                                                                                                              |          |                                | Codes |        |                                                                      |                    |
|-----------------------------------------------------------------------------------------------------------------------------------------------------|----------------|--------------------------------------------------------------------------------------------------------------|----------|--------------------------------|-------|--------|----------------------------------------------------------------------|--------------------|
| Cohort characteristic                                                                                                                               | Time frame     | Functional form of Variable and Comments                                                                     | Register | Non-ICD or ATC-Coded Variables | ATC   | ICD-10 | ICD-O/3 Morphology                                                   | ICD-O/3 Topography |
| <b>Childhood cancer definition according to the ICC3</b>                                                                                            |                |                                                                                                              |          |                                |       |        |                                                                      |                    |
| I. Leukemias, myeloproliferative diseases and myelodysplastic diseases.                                                                             |                |                                                                                                              |          |                                |       |        |                                                                      |                    |
| Lymphoid leukemias.                                                                                                                                 | Before age 20. | Categorical: Y/N. Composite variables: Any combination of specified ICD-O/3 morphology and topography codes. | CR       |                                |       |        | 9820, 9823, 9826, 9827, 9831-9837, 9940, 9948                        | C000-C809          |
| Acute myeloid leukemias.                                                                                                                            | Before age 20. | Categorical: Y/N. Composite variables: Any combination of specified ICD-O/3 morphology and topography codes. | CR       |                                |       |        | 9840, 9861, 9866, 9867, 9870-9874, 9891, 9895-9897, 9910, 9920, 9931 | C000-C809          |
| I. Leukemias, myeloproliferative diseases and myelodysplastic diseases:<br>- <i>Chronic myeloproliferative diseases.</i>                            | Before age 20. | Categorical: Y/N. Composite variables: Any combination of specified ICD-O/3 morphology and topography codes. | CR       |                                |       |        | 9863, 9875, 9876, 9950, 9960-9964                                    | C000-C809          |
| I. Leukemias, myeloproliferative diseases and myelodysplastic diseases:<br>- <i>Myelodysplastic syndrome and other myeloproliferative diseases.</i> | Before age 20. | Categorical: Y/N. Composite variables: Any combination of specified ICD-O/3 morphology and topography codes. | CR       |                                |       |        | 9945, 9946, 9975, 9980, 9982-9987, 9989                              | C000-C809          |

| Table 12 Definition of included covariates                                                                                     |                |                                                                                                                    |          |                                | Codes |        |                                                                                                                                                                |                    |
|--------------------------------------------------------------------------------------------------------------------------------|----------------|--------------------------------------------------------------------------------------------------------------------|----------|--------------------------------|-------|--------|----------------------------------------------------------------------------------------------------------------------------------------------------------------|--------------------|
| Cohort characteristic                                                                                                          | Time frame     | Functional form of Variable and Comments                                                                           | Register | Non-ICD or ATC-Coded Variables | ATC   | ICD-10 | ICD-O/3 Morphology                                                                                                                                             | ICD-O/3 Topography |
| I. Leukemias, myeloproliferative diseases and myelodysplastic diseases:<br>- <i>Unspecified and other specified leukemias.</i> | Before age 20. | Categorical: Y/N.<br>Composite variables:<br>Any combination of specified ICD-O/3 morphology and topography codes. | CR       |                                |       |        | 9800, 9801, 9805, 9860, 9930                                                                                                                                   | C000-C809          |
| II. Lymphomas and reticuloendothelial neoplasms.                                                                               |                |                                                                                                                    |          |                                |       |        |                                                                                                                                                                |                    |
| Hodgkin lymphomas.                                                                                                             | Before age 20. | Categorical: Y/N.<br>Composite variables:<br>Any combination of specified ICD-O/3 morphology and topography codes. | CR       |                                |       |        | 9650-9655, 9659, 9661-9665, 9667                                                                                                                               | C000-C809          |
| Non-Hodgkin lymphomas (except Burkitt lymphoma).                                                                               | Before age 20. | Categorical: Y/N.<br>Composite variables:<br>Any combination of specified ICD-O/3 morphology and topography codes. | CR       |                                |       |        | 9591, 9670, 9671, 9673, 9675, 9678-9680, 9684, 9689-9691, 9695, 9698-9702, 9705, 9708, 9709, 9714, 9716-9719, 9727-9729, 9731-9734, 9760-9762, 9764-9769, 9970 | C000-C809          |
| Burkitt lymphoma.                                                                                                              | Before age 20. | Categorical: Y/N.<br>Composite variables:<br>Any combination of specified ICD-O/3 morphology and topography codes. | CR       |                                |       |        | 9687                                                                                                                                                           | C000-C809          |
| Miscellaneous lymphoreticular neoplasms.                                                                                       | Before age 20. | Categorical: Y/N.<br>Composite variables:<br>Any combination of specified ICD-O/3 morphology and topography codes. | CR       |                                |       |        | 9740-9742, 9750, 9754-9758                                                                                                                                     | C000-C809          |

| eTable 12 Definition of included covariates                        |                |                                                                                                                    |          |                                | Codes |        |                                                                                           |                                               |
|--------------------------------------------------------------------|----------------|--------------------------------------------------------------------------------------------------------------------|----------|--------------------------------|-------|--------|-------------------------------------------------------------------------------------------|-----------------------------------------------|
| Cohort characteristic                                              | Time frame     | Functional form of Variable and Comments                                                                           | Register | Non-ICD or ATC-Coded Variables | ATC   | ICD-10 | ICD-O/3 Morphology                                                                        | ICD-O/3 Topography                            |
| Unspecified lymphomas.                                             | Before age 20. | Categorical: Y/N.<br>Composite variables:<br>Any combination of specified ICD-O/3 morphology and topography codes. | CR       |                                |       |        | 9590, 9596                                                                                | C000-C809                                     |
| III. CNS and miscellaneous intracranial and intraspinal neoplasms. |                |                                                                                                                    |          |                                |       |        |                                                                                           |                                               |
| Ependymomas and choroid plexus tumor.                              | Before age 20. | Categorical: Y/N.<br>Composite variables:<br>Any combination of specified ICD-O/3 morphology and topography codes. | CR       |                                |       |        | 9383, 9390-9394                                                                           | C000-C809                                     |
| Astrocytomas.                                                      | Before age 20. | Categorical: Y/N.<br>Composite variables:<br>Any combination of specified ICD-O/3 morphology and topography codes. | CR       |                                |       |        | 9380<br>9384, 9400-9411, 9420, 9421-9424, 9440-9442                                       | C723<br>C000-C809                             |
| Intracranial and intraspinal embryonal tumors.                     | Before age 20. | Categorical: Y/N.<br>Composite variables:<br>Any combination of specified ICD-O/3 morphology and topography codes. | CR       |                                |       |        | 9470-9474, 9480, 9508<br>9501-9504                                                        | C000-C809<br>C700-C729                        |
| Other gliomas.                                                     | Before age 20. | Categorical: Y/N.<br>Composite variables:<br>Any combination of specified ICD-O/3 morphology and topography codes. | CR       |                                |       |        | 9380<br>9381, 9382, 9430, 9444, 9450, 9451, 9460                                          | C700-C722, C724-C729, C751, C753<br>C000-C809 |
| Other specified intracranial and intraspinal neoplasms.            | Before age 20. | Categorical: Y/N.<br>Composite variables:<br>Any combination of specified ICD-O/3 morphology and topography codes. | CR       |                                |       |        | 8270-8281, 8300, 9350-9352, 9360-9362, 9412, 9413, 9492, 9493, 9505-9507, 9530-9539, 9582 | C000-C809                                     |

| eTable 12 Definition of included covariates                 |                |                                                                                                              |          |                                | Codes |        |                                                    |                                         |
|-------------------------------------------------------------|----------------|--------------------------------------------------------------------------------------------------------------|----------|--------------------------------|-------|--------|----------------------------------------------------|-----------------------------------------|
| Cohort characteristic                                       | Time frame     | Functional form of Variable and Comments                                                                     | Register | Non-ICD or ATC-Coded Variables | ATC   | ICD-10 | ICD-O/3 Morphology                                 | ICD-O/3 Topography                      |
| Unspecified intracranial and intraspinal neoplasm.          | Before age 20. | Categorical: Y/N. Composite variables: Any combination of specified ICD-O/3 morphology and topography codes. | CR       |                                |       |        | 8000-8005                                          | C700-C729, C751-C753                    |
| IV. Neuroblastoma and other peripheral nervous cell tumors. |                |                                                                                                              |          |                                |       |        |                                                    |                                         |
| Neuroblastoma and ganglioneuroblastoma.                     | Before age 20. | Categorical: Y/N. Composite variables: Any combination of specified ICD-O/3 morphology and topography codes. | CR       |                                |       |        | 9490, 9500                                         | C000-C809                               |
| Other peripheral nervous cell tumors.                       | Before age 20. | Categorical: Y/N. Composite variables: Any combination of specified ICD-O/3 morphology and topography codes. | CR       |                                |       |        | 8680-8683, 8690-8693, 8700, 9520-9523<br>9501-9504 | C000-C809<br>C000-C699, C739-C768, C809 |
| V. Retinoblastoma.                                          |                |                                                                                                              |          |                                |       |        |                                                    |                                         |
| Retinoblastoma.                                             | Before age 20. | Categorical: Y/N. Composite variables: Any combination of specified ICD-O/3 morphology and topography codes. | CR       |                                |       |        | 9510-9514                                          | C000-C809                               |
| VI. Renal tumors.                                           |                |                                                                                                              |          |                                |       |        |                                                    |                                         |

| eTable 12 Definition of included covariates                 |                |                                                                                                              |          |                                | Codes |        |                                                                                                                                                                                                                                                       |                       |
|-------------------------------------------------------------|----------------|--------------------------------------------------------------------------------------------------------------|----------|--------------------------------|-------|--------|-------------------------------------------------------------------------------------------------------------------------------------------------------------------------------------------------------------------------------------------------------|-----------------------|
| Cohort characteristic                                       | Time frame     | Functional form of Variable and Comments                                                                     | Register | Non-ICD or ATC-Coded Variables | ATC   | ICD-10 | ICD-O/3 Morphology                                                                                                                                                                                                                                    | ICD-O/3 Topography    |
| <i>Nephroblastoma and other nonepithelial renal tumors.</i> | Before age 20. | Categorical: Y/N. Composite variables: Any combination of specified ICD-O/3 morphology and topography codes. | CR       |                                |       |        | 8959, 8960, 8964-8967<br><br>8963, 9364                                                                                                                                                                                                               | C000-C809<br><br>C649 |
| Renal carcinomas.                                           | Before age 20. | Categorical: Y/N. Composite variables: Any combination of specified ICD-O/3 morphology and topography codes. | CR       |                                |       |        | 8010-8041, 8050-8075, 8082, 8120-8122, 8130-8141, 8143, 8155, 8190-8201, 8210, 8211, 8221-8231, 8240, 8241, 8244-8246, 8260-8263, 8290, 8310, 8320, 8323, 8401, 8430, 8440, 8480-8490, 8504, 8510, 8550, 8560-8576<br><br>8311, 8312, 8316-8319, 8361 | C649<br><br>C000-C809 |
| Unspecified malignant renal tumors.                         | Before age 20. | Categorical: Y/N. Composite variables: Any combination of specified ICD-O/3 morphology and topography codes. | CR       |                                |       |        | C8000-8005                                                                                                                                                                                                                                            | C649                  |
| VII. Hepatic tumors.                                        |                |                                                                                                              |          |                                |       |        |                                                                                                                                                                                                                                                       |                       |
| Hepatoblastoma.                                             | Before age 20. | Categorical: Y/N. Composite variables: Any combination of specified ICD-O/3 morphology and topography codes. | CR       |                                |       |        | 8970                                                                                                                                                                                                                                                  | C000-C809             |



| eTable 12 Definition of included covariates |                |                                                                                                              |          |                                | Codes |        |                                                                                                                                                                                                                                 |                                             |
|---------------------------------------------|----------------|--------------------------------------------------------------------------------------------------------------|----------|--------------------------------|-------|--------|---------------------------------------------------------------------------------------------------------------------------------------------------------------------------------------------------------------------------------|---------------------------------------------|
| Cohort characteristic                       | Time frame     | Functional form of Variable and Comments                                                                     | Register | Non-ICD or ATC-Coded Variables | ATC   | ICD-10 | ICD-O/3 Morphology                                                                                                                                                                                                              | ICD-O/3 Topography                          |
| Hepatic carcinomas.                         | Before age 20. | Categorical: Y/N. Composite variables: Any combination of specified ICD-O/3 morphology and topography codes. | CR       |                                |       |        | 8010-8041, 8050-8075, 8082, 8120-8122, 8140, 8141, 8143, 8155, 8190-8201, 8210, 8211, 8230, 8231, 8240, 8241, 8244-8246, 8260-8264, 8310, 8320, 8323, 8401, 8430, 8440, 8480-8490, 8504, 8510, 8550, 8560-8576<br><br>8160-8180 | C220, C221<br><br>C000-C809                 |
| Unspecified malignant hepatic tumors.       | Before age 20. | Categorical: Y/N. Composite variables: Any combination of specified ICD-O/3 morphology and topography codes. | CR       |                                |       |        | 8000-8005                                                                                                                                                                                                                       | C220, C221                                  |
| VIII. Malignant bone tumors.                |                |                                                                                                              |          |                                |       |        |                                                                                                                                                                                                                                 |                                             |
| Osteosarcomas.                              | Before age 20. | Categorical: Y/N. Composite variables: Any combination of specified ICD-O/3 morphology and topography codes. | CR       |                                |       |        | 9180-9187, 9191-9195, 9200                                                                                                                                                                                                      | C400-C419, C760-C768, C809                  |
| Chondrosarcomas.                            | Before age 20. | Categorical: Y/N. Composite variables: Any combination of specified ICD-O/3 morphology and topography codes. | CR       |                                |       |        | 9210, 9220, 9240<br><br>9221, 9230, 9241-9243                                                                                                                                                                                   | C400-C419, C760-C768, C809<br><br>C000-C809 |
| Ewing tumor and related sarcomas of bone.   | Before age 20. | Categorical: Y/N. Composite variables: Any combination of specified ICD-O/3 morphology and topography codes. | CR       |                                |       |        | 9260<br><br>9363-9365                                                                                                                                                                                                           | C400-C419, C760-C768, C809<br><br>C400-C419 |

| eTable 12 Definition of included covariates                                |                |                                                                                                              |          |                                | Codes |        |                                                                                                                                               |                                             |
|----------------------------------------------------------------------------|----------------|--------------------------------------------------------------------------------------------------------------|----------|--------------------------------|-------|--------|-----------------------------------------------------------------------------------------------------------------------------------------------|---------------------------------------------|
| Cohort characteristic                                                      | Time frame     | Functional form of Variable and Comments                                                                     | Register | Non-ICD or ATC-Coded Variables | ATC   | ICD-10 | ICD-O/3 Morphology                                                                                                                            | ICD-O/3 Topography                          |
| Other specified malignant bone tumors.                                     | Before age 20. | Categorical: Y/N. Composite variables: Any combination of specified ICD-O/3 morphology and topography codes. | CR       |                                |       |        | 8810, 8811, 8823, 8830<br><br>8812, 9250, 9261, 9262, 9270-9275, 9280-9282, 9290, 9300-9302, 9310-9312, 9320-9322, 9330, 9340-9342, 9370-9372 | C400-C419<br><br>C000-C809                  |
| Unspecified malignant bone tumors.                                         | Before age 20. | Categorical: Y/N. Composite variables: Any combination of specified ICD-O/3 morphology and topography codes. | CR       |                                |       |        | 8000-8005, 8800, 8801, 8803-8805                                                                                                              | C400-C419                                   |
| IX. Soft tissue and other extrasosseous sarcomas.                          |                |                                                                                                              |          |                                |       |        |                                                                                                                                               |                                             |
| Rhabdomyosarcomas.                                                         | Before age 20. | Categorical: Y/N. Composite variables: Any combination of specified ICD-O/3 morphology and topography codes. | CR       |                                |       |        | 8900-8905, 8910, 8912, 8920, 8991                                                                                                             | C000-C809                                   |
| Fibrosarcomas, peripheral nerve sheath tumors and other fibrous neoplasms. | Before age 20. | Categorical: Y/N. Composite variables: Any combination of specified ICD-O/3 morphology and topography codes. | CR       |                                |       |        | 8810, 8811, 8813-8815, 8821, 8823, 8834-8835<br><br>8820, 8822, 8824-8827, 9150, 9160, 9491, 9540-9571, 9580                                  | C000-C399, C440-C768, C809<br><br>C000-C809 |
| Kaposi sarcoma.                                                            | Before age 20. | Categorical: Y/N. Composite variables: Any combination of specified ICD-O/3 morphology and topography codes. | CR       |                                |       |        | 9140                                                                                                                                          | C000-C809                                   |

| eTable 12 Definition of included covariates                        |                |                                                                                                                    |          |                                | Codes |        |                                                                                                                                                                                                                                                                                                                  |                                                                                                                                                                                                                                                                |
|--------------------------------------------------------------------|----------------|--------------------------------------------------------------------------------------------------------------------|----------|--------------------------------|-------|--------|------------------------------------------------------------------------------------------------------------------------------------------------------------------------------------------------------------------------------------------------------------------------------------------------------------------|----------------------------------------------------------------------------------------------------------------------------------------------------------------------------------------------------------------------------------------------------------------|
| Cohort characteristic                                              | Time frame     | Functional form of Variable and Comments                                                                           | Register | Non-ICD or ATC-Coded Variables | ATC   | ICD-10 | ICD-O/3 Morphology                                                                                                                                                                                                                                                                                               | ICD-O/3 Topography                                                                                                                                                                                                                                             |
| Other specified soft tissue sarcomas.                              | Before age 20. | Categorical: Y/N.<br>Composite variables:<br>Any combination of specified ICD-O/3 morphology and topography codes. | CR       |                                |       |        | 8587, 8710-8713, 8806, 8831-8833, 8836, 8840-8842, 8850-8858, 8860-8862, 8870, 8880, 8881, 8890-8898, 8921, 8982, 8990, 9040-9044, 9120-9125, 9130-9133, 9135, 9136, 9141, 9142, 9161, 9170-9175, 9231, 9251, 9252, 9373, 9581<br>8830<br><br>8963<br><br>9180, 9210, 9220, 9240<br>9260<br><br>9364<br><br>9365 | C000-C809<br><br><br><br><br><br><br><br><br><br><br><br>C000-C399, C440-C768, C809<br>C000-C639, C659-C699, C739-C768, C809<br>C490-C499<br>C000-C399, C470-C759<br>C000-C399, C470-C639, C659-C699, C739-C768, C809<br>C000-C399, C470-C639, C659-C768, C809 |
| Unspecified soft tissue sarcomas.                                  | Before age 20. | Categorical: Y/N.<br>Composite variables:<br>Any combination of specified ICD-O/3 morphology and topography codes. | CR       |                                |       |        | 8800-8805                                                                                                                                                                                                                                                                                                        | C000-C399, C440-C768, C809                                                                                                                                                                                                                                     |
| X. Germ cell tumors, trophoblastic tumors and neoplasms of gonads. |                |                                                                                                                    |          |                                |       |        |                                                                                                                                                                                                                                                                                                                  |                                                                                                                                                                                                                                                                |

| Table 12 Definition of included covariates                        |                |                                                                                                              |          |                                | Codes |        |                                                                                                                                                                                                                                                                       |                                                             |
|-------------------------------------------------------------------|----------------|--------------------------------------------------------------------------------------------------------------|----------|--------------------------------|-------|--------|-----------------------------------------------------------------------------------------------------------------------------------------------------------------------------------------------------------------------------------------------------------------------|-------------------------------------------------------------|
| Cohort characteristic                                             | Time frame     | Functional form of Variable and Comments                                                                     | Register | Non-ICD or ATC-Coded Variables | ATC   | ICD-10 | ICD-O/3 Morphology                                                                                                                                                                                                                                                    | ICD-O/3 Topography                                          |
| Intracranial and intraspinal germ cell tumors.                    | Before age 20. | Categorical: Y/N. Composite variables: Any combination of specified ICD-O/3 morphology and topography codes. | CR       |                                |       |        | 9060-9065, 9070-9072, 9080-9085, 9100, 9101                                                                                                                                                                                                                           | C700-C729, C751-C753                                        |
| Malignant extracranial and extragonadal germ cell tumors.         | Before age 20. | Categorical: Y/N. Composite variables: Any combination of specified ICD-O/3 morphology and topography codes. | CR       |                                |       |        | 9060-9065, 9070-9072, 9080-9085, 9100-9105                                                                                                                                                                                                                            | C000-C559, C570-C619, C630-C699, C739-C750, C754-C768, C809 |
| Malignant gonadal germ cell tumors.                               | Before age 20. | Categorical: Y/N. Composite variables: Any combination of specified ICD-O/3 morphology and topography codes. | CR       |                                |       |        | 9060-9065, 9070-9073, 9080-9085, 9090, 9091, 9100, 9101                                                                                                                                                                                                               | C569, C620-C629                                             |
| Gonadal carcinomas.                                               | Before age 20. | Categorical: Y/N. Composite variables: Any combination of specified ICD-O/3 morphology and topography codes. | CR       |                                |       |        | 8010-8041, 8050-8075, 8082, 8120-8122, 8130-8141, 8143, 8190-8201, 8210, 8211, 8221-8241, 8244-8246, 8260-8263, 8290, 8310, 8313, 8320, 8323, 8380-8384, 8430, 8440, 8480-8490, 8504, 8510, 8550, 8560-8573, 9000, 9014, 9015<br><br>8441-8444, 8450, 8451, 8460-8473 | C569, C620-C629<br><br>C000-C809                            |
| Other and unspecified malignant gonadal tumors.                   | Before age 20. | Categorical: Y/N. Composite variables: Any combination of specified ICD-O/3 morphology and topography codes. | CR       |                                |       |        | 8590-8671<br><br>8000-8005                                                                                                                                                                                                                                            | C000-C809<br><br>C569, C620-C629                            |
| XI. Other malignant epithelial neoplasms and malignant melanomas. |                |                                                                                                              |          |                                |       |        |                                                                                                                                                                                                                                                                       |                                                             |

| eTable 12 Definition of included covariates |                |                                                                                                              |          |                                | Codes |        |                                                                                                                                                                                                               |                       |
|---------------------------------------------|----------------|--------------------------------------------------------------------------------------------------------------|----------|--------------------------------|-------|--------|---------------------------------------------------------------------------------------------------------------------------------------------------------------------------------------------------------------|-----------------------|
| Cohort characteristic                       | Time frame     | Functional form of Variable and Comments                                                                     | Register | Non-ICD or ATC-Coded Variables | ATC   | ICD-10 | ICD-O/3 Morphology                                                                                                                                                                                            | ICD-O/3 Topography    |
| Adrenocortical carcinomas.                  | Before age 20. | Categorical: Y/N. Composite variables: Any combination of specified ICD-O/3 morphology and topography codes. | CR       |                                |       |        | 8370-8375                                                                                                                                                                                                     | C000-C809             |
| Thyroid carcinomas.                         | Before age 20. | Categorical: Y/N. Composite variables: Any combination of specified ICD-O/3 morphology and topography codes. | CR       |                                |       |        | 8010-8041, 8050-8075, 8082, 8120-8122, 8130-8141, 8190, 8200, 8201, 8211, 8230, 8231, 8244-8246, 8260-8263, 8290, 8310, 8320, 8323, 8430, 8440, 8480, 8481, 8510, 8560-8573<br><br>8330-8337, 8340-8347, 8350 | C739<br><br>C000-C809 |
| Nasopharyngeal carcinomas.                  | Before age 20. | Categorical: Y/N. Composite variables: Any combination of specified ICD-O/3 morphology and topography codes. | CR       |                                |       |        | 8010-8041, 8050-8075, 8082, 8083, 8120-8122, 8130-8141, 8190, 8200, 8201, 8211, 8230, 8231, 8244-8246, 8260-8263, 8290, 8310, 8320, 8323, 8430, 8440, 8480, 8481, 8500-8576                                   | C110-C119             |
| Malignant melanomas.                        | Before age 20. | Categorical: Y/N. Composite variables: Any combination of specified ICD-O/3 morphology and topography codes. | CR       |                                |       |        | 8720-8780, 8790                                                                                                                                                                                               | C000-C809             |
| Skin carcinomas.                            | Before age 20. | Categorical: Y/N. Composite variables: Any combination of specified ICD-O/3 morphology and topography codes. | CR       |                                |       |        | 8010-8041, 8050-8075, 8078, 8082, 8090-8110, 8140, 8143, 8147, 8190, 8200, 8240, 8246, 8247, 8260, 8310, 8320, 8323, 8390-8420, 8430, 8480, 8542, 8560, 8570-8573, 8940, 8941                                 | C440-C449             |

| eTable 12 Definition of included covariates     |                |                                                                                                              |          |                                | Codes |        |                                                                                                                                                                               |                                                                                                         |
|-------------------------------------------------|----------------|--------------------------------------------------------------------------------------------------------------|----------|--------------------------------|-------|--------|-------------------------------------------------------------------------------------------------------------------------------------------------------------------------------|---------------------------------------------------------------------------------------------------------|
| Cohort characteristic                           | Time frame     | Functional form of Variable and Comments                                                                     | Register | Non-ICD or ATC-Coded Variables | ATC   | ICD-10 | ICD-O/3 Morphology                                                                                                                                                            | ICD-O/3 Topography                                                                                      |
| Other and unspecified carcinomas.               | Before age 20. | Categorical: Y/N. Composite variables: Any combination of specified ICD-O/3 morphology and topography codes. | CR       |                                |       |        | 8010-8084, 8120-8157, 8190-8264, 8290, 8310, 8313-8315, 8320-8325, 8360, 8380-8384, 8430-8440, 8452-8454, 8480-8586, 8588-8589, 8940, 8941, 8983, 9000, 9010-9016, 9020, 9030 | C000-C109, C129-C218, C239-C399, C480-C488, C500-C559, C570-C619, C630-C639, C659-C729, C750-C768, C809 |
| XII. Other and unspecified malignant neoplasms. |                |                                                                                                              |          |                                |       |        |                                                                                                                                                                               |                                                                                                         |
| Other specified malignant tumors.               | Before age 20. | Categorical: Y/N. Composite variables: Any combination of specified ICD-O/3 morphology and topography codes. | CR       |                                |       |        | 8930-8936, 8950, 8951, 8971-8981, 9050-9055, 9110<br><br>9363                                                                                                                 | C000-C809<br><br>C000-C399, C470-C759                                                                   |
| Other unspecified malignant tumors.             | Before age 20. | Categorical: Y/N. Composite variables: Any combination of specified ICD-O/3 morphology and topography codes. | CR       |                                |       |        | 8000-8005                                                                                                                                                                     | C000-C218, C239-C399, C420-C559, C570-C619, C630-C639, C659-C699, C739-C750, C754-C809                  |

### eReferences.

1. Margulis AV, Hernandez-Diaz S, McElrath T, et al. Relation of in-utero exposure to antiepileptic drugs to pregnancy duration and size at birth. *PLoS One*. 2019;14(8):e0214180.
2. EUROCAT. EUROCAT Guide 1.4 and Reference Documents 2018.
